# Supplementary material for: First-principles study on the mechanical and electronic properties of energetic molecular perovskites AM(ClO4)3 (A = C6H14N22+, C4H12N22+, C6H14N2O2+; M = Na+, K+)
Source: Royal Society of Chemistry journal article supplement (doi:10.1039/d2ra03407g), 2022-01-01
Supplement: d2ra03407g1.pdf [file d2ra03407g1.pdf]

## Supporting information

### First-principles study on the mechanical and electronic properties of energetic molecular perovskites $AM(ClO_4)_3$ ( $A = C_6H_{14}N_2^{2+}, C_4H_{12}N_2^{2+}, C_6H_{14}N_2O^{2+}; M = Na^+, K^+$ )

Qiaoli Li<sup>a</sup>, Shenshen Li<sup>a</sup>, Jijun Xiao<sup>a,\*</sup>

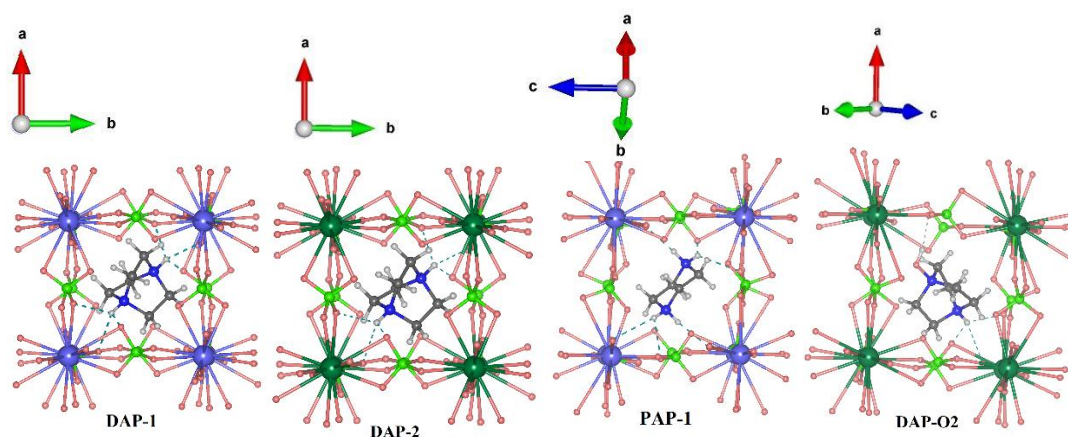

**Figure S1.** Cage structures of  $AM(ClO_4)_3$ . H atom in light grey, C atom in dark grey, N atom in blue, O atom in pink, Cl atom in green, Na atom in purple, K atom in dark green. Hydrogen bonds are represented by dashed lines.

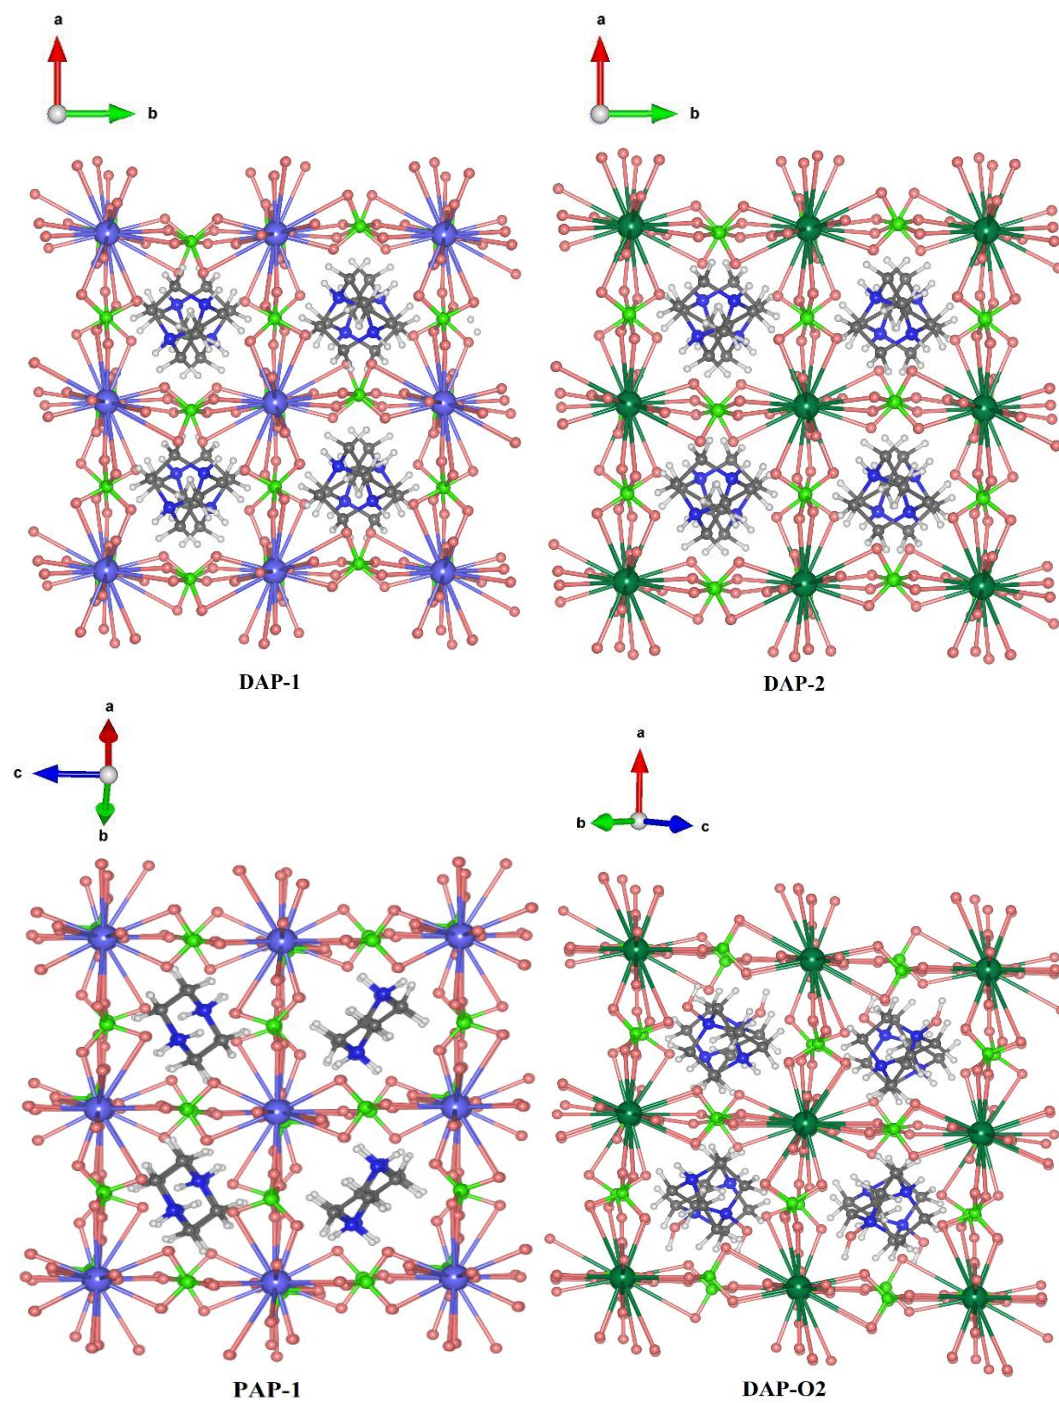

**Figure S2.** Packing structures of  $AM(ClO_4)_3$ . H atom in light grey, C atom in dark gray, N atom in blue, O atom in pink, Cl atom in green, Na atom in purple, K atom in dark green.

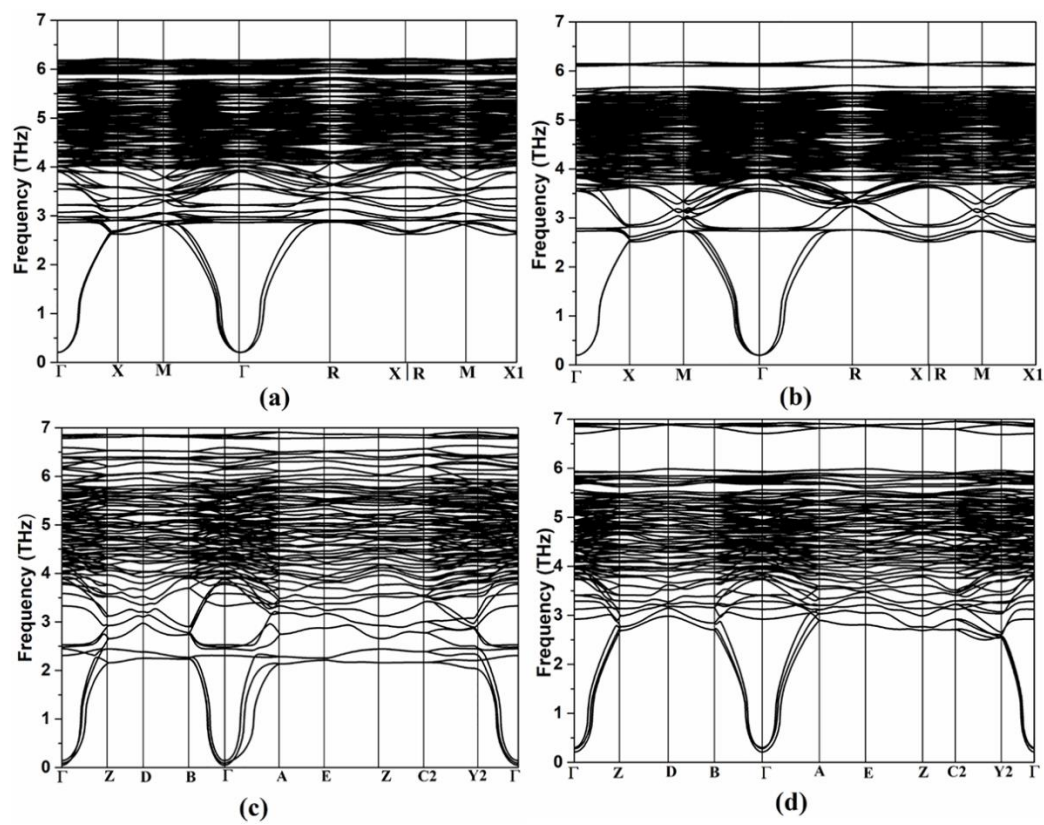

**Figure S3.** Phonon dispersion curves of (a) DAP-1, (b) DAP-2, (c) PAP-1 and (d) DAP-O2.
